# Supplementary material for: PD‐L1+ dendritic cells in the tumor microenvironment correlate with good prognosis and CD8+ T cell infiltration in colon cancer
Source: PubMed Central journal article supplement — Cancer Sci. 2021 Jan 21;112(3):1173–83. doi: 10.1111/cas.14781 (PMC7935795; doi:10.1111/cas.14781), 2021-01-21
Supplement: CAS-112-1173-s001.pdf [file CAS-112-1173-s001.pdf]

**Supplementary Table 1.** 3D Histech fluorescence microscope scanner optical specifications (A) Lumencor Spectra-6 LED Light engine specifications. (B & C) Semrock epifluorescence cube excitation (B) and emission (C) specifications. (D) Semrock epifluorescence cube part numbers.

**A. Lumencor Spectra-6 LED Light Engine**

| Fluor | Channel Name | Bandpass Filter | Power (mW) |
|-------|--------------|-----------------|------------|
| DAPI  | Violet       | 386/23          | 186        |
| FITC  | Cyan         | 475/28          | 174        |
| AF555 | Green        | 550/88          | 909        |
| AF594 | Green        | 550/88          | 909        |
| Cy5   | Red          | 650/13          | 96         |

**B. Semrock Epifluorescence Filter Cube – Excitation Optics**

| Semrock Cube           | Fluor     | Excitation Filter Transmission Range | Dichroic Beamsplitter Reflection Ravg > 95% |
|------------------------|-----------|--------------------------------------|---------------------------------------------|
| LED-DA/FI/TR/Cy5-A-000 | DAPI      | 378.3 - 406.8 nm                     | 380 - 404 nm                                |
|                        | FITC      | 459.0 - 489.7 nm                     | 461 - 487.5 nm                              |
|                        | Cy5       | 623.1 - 646.9 nm                     | 626 - 644 nm                                |
| SpGold-B-000           | AF555/Cy3 | 521.2 - 546.8 nm                     | 350 - 544 nm                                |
| SpRed-B-000            | AF594     | 573.1 - 599.0 nm                     | 350 - 596 nm                                |

**C. Semrock Epifluorescence Filter Cube – Emission Optics**

| Semrock Cube           | Fluor     | Emission Filter Transmission Range | Dichroic Beamsplitter Reflection Tavg > 93% |
|------------------------|-----------|------------------------------------|---------------------------------------------|
| LED-DA/FI/TR/Cy5-A-000 | DAPI      | 412.2 - 451.9 nm                   | 414 - 450 nm                                |
|                        | FITC      | 497.1 - 532.6 nm                   | 499.5 - 530 nm                              |
|                        | Cy5       | 656.9 - 804.1 nm                   | 659.5 - 800 nm                              |
| SpGold-B-000           | AF555/Cy3 | 555.0 - 589.1 nm                   | 558 - 950 nm                                |
| SpRed-B-000            | AF594     | 608.9 - 647.1 nm                   | 612 - 950 nm                                |

**D. Semrock Epifluorescence Filter Cube Details**

| Semrock Cube           | Excitation Filter    | Dichroic               | Emission Filter      |
|------------------------|----------------------|------------------------|----------------------|
| LED-DA/FI/TR/Cy5-A-000 | FF01-392/474/554/635 | FF409/493/573/652-Di01 | FF01-432/515/595/730 |
| SpGold-B-000           | FF01-534/20          | FF552-Di02             | FF01-572/28          |
| SpRed-B-000            | FF01-586/20          | FF605-Di02             | FF01-628/32          |

**Supplementary Table 2.** Image capture and adjustment settings. The following camera capture speeds and display levels were used to acquire and analyse fluorescence scans for this study.

#### **Camera Exposure and Display Levels**

| <b>Channel</b> | <b>Marker</b>     | <b>Shutter Speed (ms)</b> | <b>Black Level</b> | <b>White Level</b> |
|----------------|-------------------|---------------------------|--------------------|--------------------|
| DAPI           | DAPI              | 10                        | 0                  | 24,050             |
| FITC           | CD8 TSA-FITC      | 15                        | 0                  | 18,939             |
| SpGold         | Cytokeratin AF555 | 25                        | 0                  | 21,503             |
| SpRed          | CD11c AF594       | 30                        | 0                  | 9,920              |
| Cy5            | PD-L1 TSA- Cy5    | 12                        | 0                  | 8,000              |

**Supplementary Table 3** . Median and interquartile range (IQR) of each variable by tissue core and region analysed.

| Marker                               | Core         | Region     | N   | Median (IQR)    |
|--------------------------------------|--------------|------------|-----|-----------------|
| CD8 (cells/mm <sup>2</sup> )         | Tumour       | Tissue     | 221 | 205 (76 - 464)  |
|                                      |              | Epithelium | 221 | 60 (22 - 227)   |
|                                      |              | Stroma     | 221 | 315 (121 - 616) |
|                                      | Leading Edge | Tissue     | 143 | 298 (126 - 744) |
|                                      |              | Epithelium | 143 | 72 (11 - 309)   |
|                                      |              | Stroma     | 143 | 372 (165 - 849) |
|                                      | Normal       | Tissue     | 134 | 464 (228 - 722) |
|                                      |              | Epithelium | 134 | 261 (131 - 585) |
|                                      |              | Stroma     | 134 | 564 (312 - 930) |
| CD11c (cells/mm <sup>2</sup> )       | Tumour       | Tissue     | 221 | 85 (31 - 186)   |
|                                      |              | Epithelium | 221 | 23 (9 - 59)     |
|                                      |              | Stroma     | 221 | 127 (45 - 337)  |
|                                      | Leading Edge | Tissue     | 143 | 76 (33 - 172)   |
|                                      |              | Epithelium | 143 | 27 (7 - 69)     |
|                                      |              | Stroma     | 143 | 101 (36 - 222)  |
|                                      | Normal       | Tissue     | 134 | 56 (21 - 100)   |
|                                      |              | Epithelium | 134 | 9 (3 - 23)      |
|                                      |              | Stroma     | 134 | 116 (38 - 185)  |
| CD11c+PDL1+ (cells/mm <sup>2</sup> ) | Tumour       | Tissue     | 221 | 12 (2 - 55)     |
|                                      |              | Epithelium | 221 | 0 (0 - 5)       |
|                                      |              | Stroma     | 221 | 23 (2 - 101)    |
|                                      | Leading Edge | Tissue     | 143 | 12 (1 - 89)     |
|                                      |              | Epithelium | 143 | 0 (0 - 14)      |
|                                      |              | Stroma     | 143 | 15 (1 - 103)    |
|                                      | Normal       | Tissue     | 134 | 2 (0 - 13)      |
|                                      |              | Epithelium | 134 | 0 (0 - 0)       |
|                                      |              | Stroma     | 134 | 4 (0 - 27)      |
| CD11c+PDL1- (cells/mm <sup>2</sup> ) | Tumour       | Tissue     | 221 | 50 (20 - 111)   |
|                                      |              | Epithelium | 221 | 16 (7 - 39)     |
|                                      |              | Stroma     | 221 | 78 (29 - 176)   |
|                                      | Leading Edge | Tissue     | 143 | 44 (20 - 82)    |
|                                      |              | Epithelium | 143 | 17 (3 - 38)     |
|                                      |              | Stroma     | 143 | 49 (18 - 112)   |
|                                      | Normal       | Tissue     | 134 | 49 (19 - 88)    |
|                                      |              | Epithelium | 134 | 9 (3 - 21)      |
|                                      |              | Stroma     | 134 | 88 (34 - 167)   |
| PDL1+/CD11c+ (%)*                    | Tumour       | Tissue     | 218 | 18 (3 - 42)     |
|                                      |              | Epithelium | 210 | 0 (0 - 20)      |
|                                      |              | Stroma     | 218 | 20 (3 - 48)     |
|                                      | Leading Edge | Tissue     | 143 | 25 (2 - 61)     |
|                                      |              | Epithelium | 121 | 6 (0 - 50)      |
|                                      |              | Stroma     | 140 | 25 (2 - 67)     |
|                                      | Normal       | Tissue     | 131 | 4 (0 - 18)      |
|                                      |              | Epithelium | 110 | 0 (0 - 0)       |
|                                      |              | Stroma     | 130 | 4 (0 - 22)      |

\*Variable classified as zero if no double positives were found. If no CD11c+ cells were found then variable was excluded.

**Supplementary Table 4** . Univariate Cox regression for immune-related variables in leading edge cores for T stage 3 and 4 cases only

| Marker                                                                              | Region | N   | HR   | L 95%CI | U 95%CI | Wald P       | Log-Rank P   |
|-------------------------------------------------------------------------------------|--------|-----|------|---------|---------|--------------|--------------|
| <b>CD8<sup>+</sup> cell density - Leading Edge (high vs low)</b>                    | Tumour | 125 | 0.53 | 0.32    | 0.87    | <b>0.012</b> | <b>0.011</b> |
|                                                                                     | Stroma | 125 | 0.66 | 0.41    | 1.07    | 0.093        | 0.091        |
| <b>CD11c<sup>+</sup> cell density - Leading Edge (high vs low)</b>                  | Tumour | 125 | 0.80 | 0.49    | 1.29    | 0.361        | 0.361        |
|                                                                                     | Stroma | 125 | 0.47 | 0.28    | 0.77    | <b>0.003</b> | <b>0.002</b> |
| <b>CD11c<sup>+</sup>PD-L1<sup>+</sup> cell density - Leading Edge (high vs low)</b> | Tumour | 125 | 0.58 | 0.35    | 0.96    | <b>0.033</b> | <b>0.031</b> |
|                                                                                     | Stroma | 125 | 0.46 | 0.28    | 0.75    | <b>0.002</b> | <b>0.002</b> |

**Supplementary Table 5.** Univariate Cox regression for immune-related variables in central tumour and matched normal tissue cores. Significant P-values highlighted in bold.

| Marker                                                             | Region         | N   | HR   | L95% CI | U95%CI | Wald P       |
|--------------------------------------------------------------------|----------------|-----|------|---------|--------|--------------|
| CD8 <sup>+</sup> cell density - Central Tumour                     | Tumour         | 221 | 0.68 | 0.47    | 0.97   | <b>0.035</b> |
|                                                                    | Stromal        | 221 | 0.79 | 0.55    | 1.14   | 0.204        |
| CD11c <sup>+</sup> cell density - Central Tumour                   | Tumour         | 221 | 1.01 | 0.70    | 1.46   | 0.941        |
|                                                                    | Stromal        | 221 | 0.77 | 0.54    | 1.11   | 0.164        |
| CD11c <sup>+</sup> PDL1 <sup>+</sup> cell density - Central Tumour | Tumour         | 221 | 0.84 | 0.58    | 1.21   | 0.348        |
|                                                                    | Stromal        | 221 | 0.73 | 0.51    | 1.05   | 0.090        |
| CD11c <sup>+</sup> PDL1 <sup>-</sup> cell density - Central Tumour | Tumour         | 221 | 1.07 | 0.73    | 1.55   | 0.742        |
|                                                                    | Stromal        | 221 | 0.89 | 0.62    | 1.28   | 0.523        |
| % PDL1 <sup>+</sup> /CD11c <sup>+</sup> cells - Central Tumour     | Tumour         | 210 | 0.88 | 0.60    | 1.28   | 0.502        |
|                                                                    | Stromal        | 218 | 0.72 | 0.50    | 1.04   | 0.078        |
| CD8 <sup>+</sup> cell density - Normal                             | Epithelium     | 134 | 1.64 | 1.03    | 2.61   | <b>0.037</b> |
|                                                                    | Lamina propria | 134 | 1.37 | 0.87    | 2.18   | 0.177        |
| CD11c <sup>+</sup> cell density - Normal                           | Epithelium     | 134 | 1.22 | 0.77    | 1.93   | 0.404        |
|                                                                    | Lamina propria | 134 | 0.94 | 0.59    | 1.49   | 0.789        |
| CD11c <sup>+</sup> PDL1 <sup>+</sup> cell density - Normal         | Epithelium     | 134 | 1.25 | 0.60    | 2.60   | 0.555        |
|                                                                    | Lamina propria | 134 | 1.35 | 0.85    | 2.14   | 0.201        |
| CD11c <sup>+</sup> PDL1 <sup>-</sup> cell density - Normal         | Tumour         | 134 | 1.21 | 0.77    | 1.92   | 0.409        |
|                                                                    | Stromal        | 134 | 0.89 | 0.56    | 1.41   | 0.627        |
| % PDL1 <sup>+</sup> /CD11c <sup>+</sup> cells - Normal             | Tumour         | 110 | 1.28 | 0.61    | 2.69   | 0.520        |
|                                                                    | Stromal        | 130 | 1.29 | 0.81    | 2.06   | 0.285        |

All variables are reported as high vs low, split at the median value

**Supplementary Table 6.** Univariate Cox regression for the density and proportion of CD8<sup>+</sup> cells within distance zones from the closest CD11c<sup>+</sup> or CD11c<sup>+</sup>PD-L1<sup>+</sup> cells on leading edge cores.

| Marker         | Mask                                  | Distance | Continuous |          |         |        | Categorical |          |         |        |         |
|----------------|---------------------------------------|----------|------------|----------|---------|--------|-------------|----------|---------|--------|---------|
|                |                                       |          | N          | *Adj. HR | L95% CI | U95%CI | *Adj. P     | *Adj. HR | L95% CI | U95%CI | *Adj. P |
| CD8 Density    | CD11c <sup>+</sup>                    | 0-10um   | 143        | 1.00     | 1.00    | 1.00   | 0.677       | 1.04     | 0.64    | 1.68   | 0.881   |
|                |                                       | 0-100um  | 143        | 1.00     | 1.00    | 1.00   | 0.964       | 0.88     | 0.55    | 1.41   | 0.587   |
|                |                                       | >100um   | 143        | 1.00     | 1.00    | 1.00   | 0.385       | 0.75     | 0.47    | 1.20   | 0.234   |
|                | CD11c <sup>+</sup> PD-L1 <sup>+</sup> | 0-10um   | 44         | 1.00     | 1.00    | 1.00   | 0.262       | 2.52     | 0.87    | 7.30   | 0.088   |
|                |                                       | 0-100um  | 44         | 1.00     | 1.00    | 1.00   | 0.454       | 0.58     | 0.21    | 1.61   | 0.297   |
|                |                                       | >100um   | 44         | 1.00     | 1.00    | 1.00   | 0.630       | 1.09     | 0.41    | 2.92   | 0.869   |
| CD8 Proportion | CD11c <sup>+</sup>                    | 0-10um   | 143        | 1.01     | 0.99    | 1.03   | 0.341       | 1.16     | 0.66    | 2.05   | 0.606   |
|                |                                       | 0-100um  | 143        | 1.01     | 0.99    | 1.02   | 0.287       | 1.29     | 0.78    | 2.13   | 0.320   |
|                |                                       | >100um   | 143        | 0.99     | 0.98    | 1.01   | 0.287       | 0.81     | 0.49    | 1.34   | 0.416   |
|                | CD11c <sup>+</sup> PD-L1 <sup>+</sup> | 0-10um   | 44         | 0.98     | 0.91    | 1.06   | 0.624       | 1.82     | 0.60    | 5.55   | 0.289   |
|                |                                       | 0-100um  | 44         | 1.02     | 0.99    | 1.05   | 0.168       | 2.33     | 0.79    | 6.92   | 0.127   |
|                |                                       | >100um   | 44         | 0.98     | 0.96    | 1.01   | 0.168       | 0.43     | 0.15    | 1.27   | 0.127   |

\*Adjusted for total CD11c<sup>+</sup> or CD11c<sup>+</sup>PD-L1<sup>+</sup> cell density

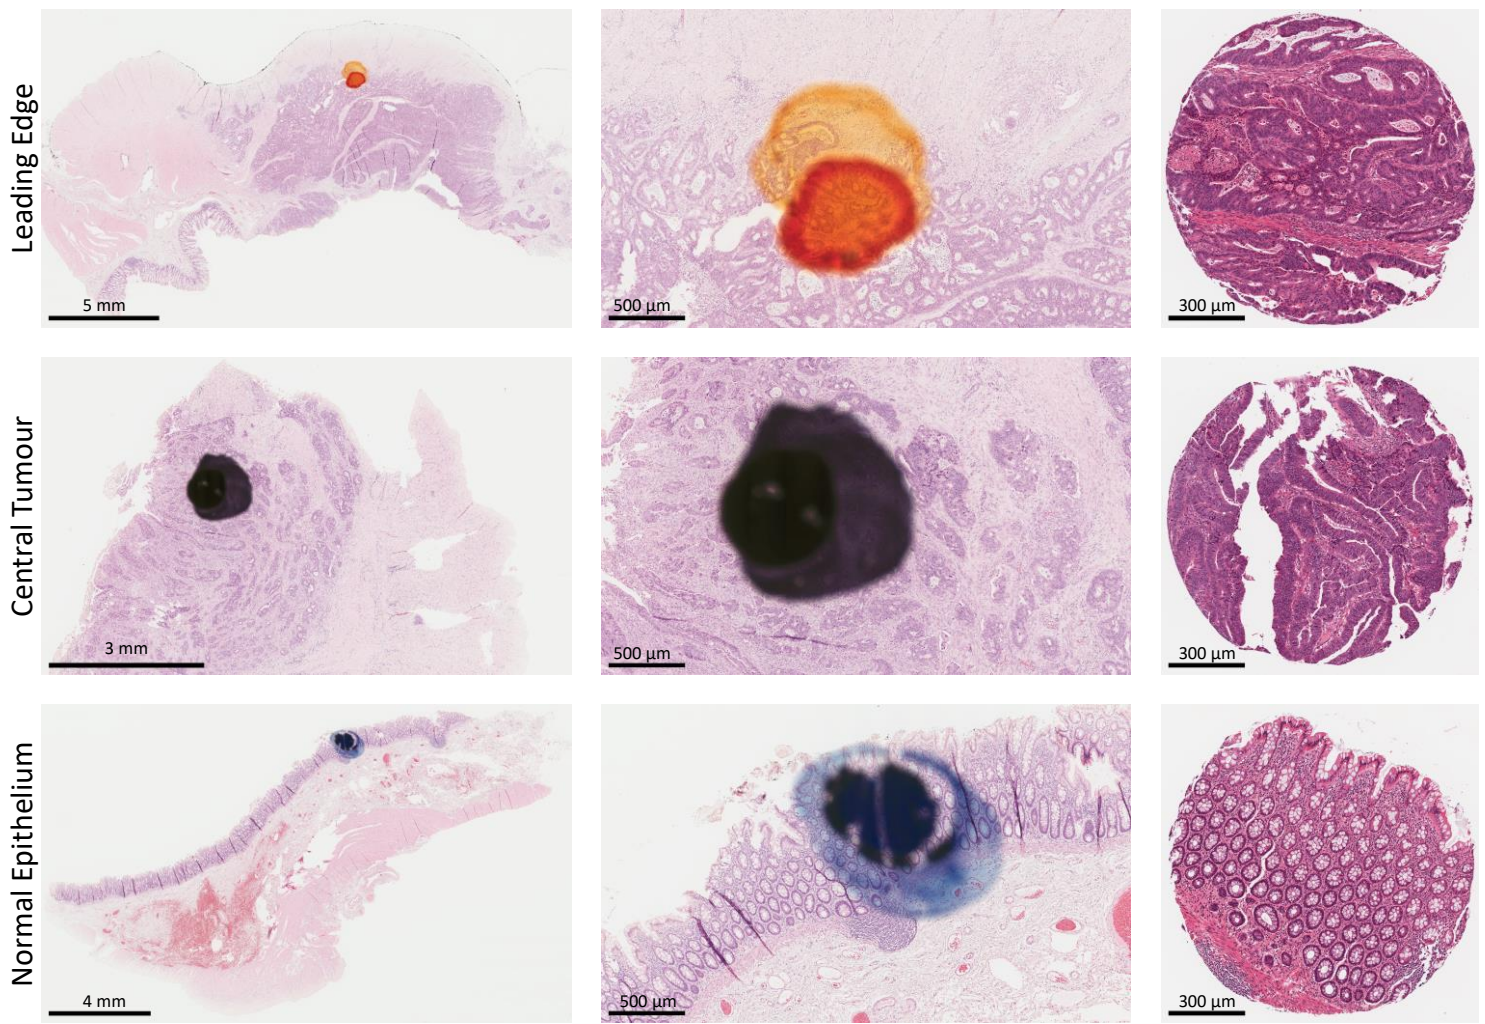

**Supplementary Figure 1. Selection of regions of interest.**

Areas of leading edge tumour (top row), central tumour (middle row) and normal colonic epithelium (bottom row) were identified by a pathologist using H&E-stained sections (left and centre columns). TMAs were constructed using marked slides as a guide. The resultant cores from the marked areas are shown in the far right column. Scale bars as annotated.

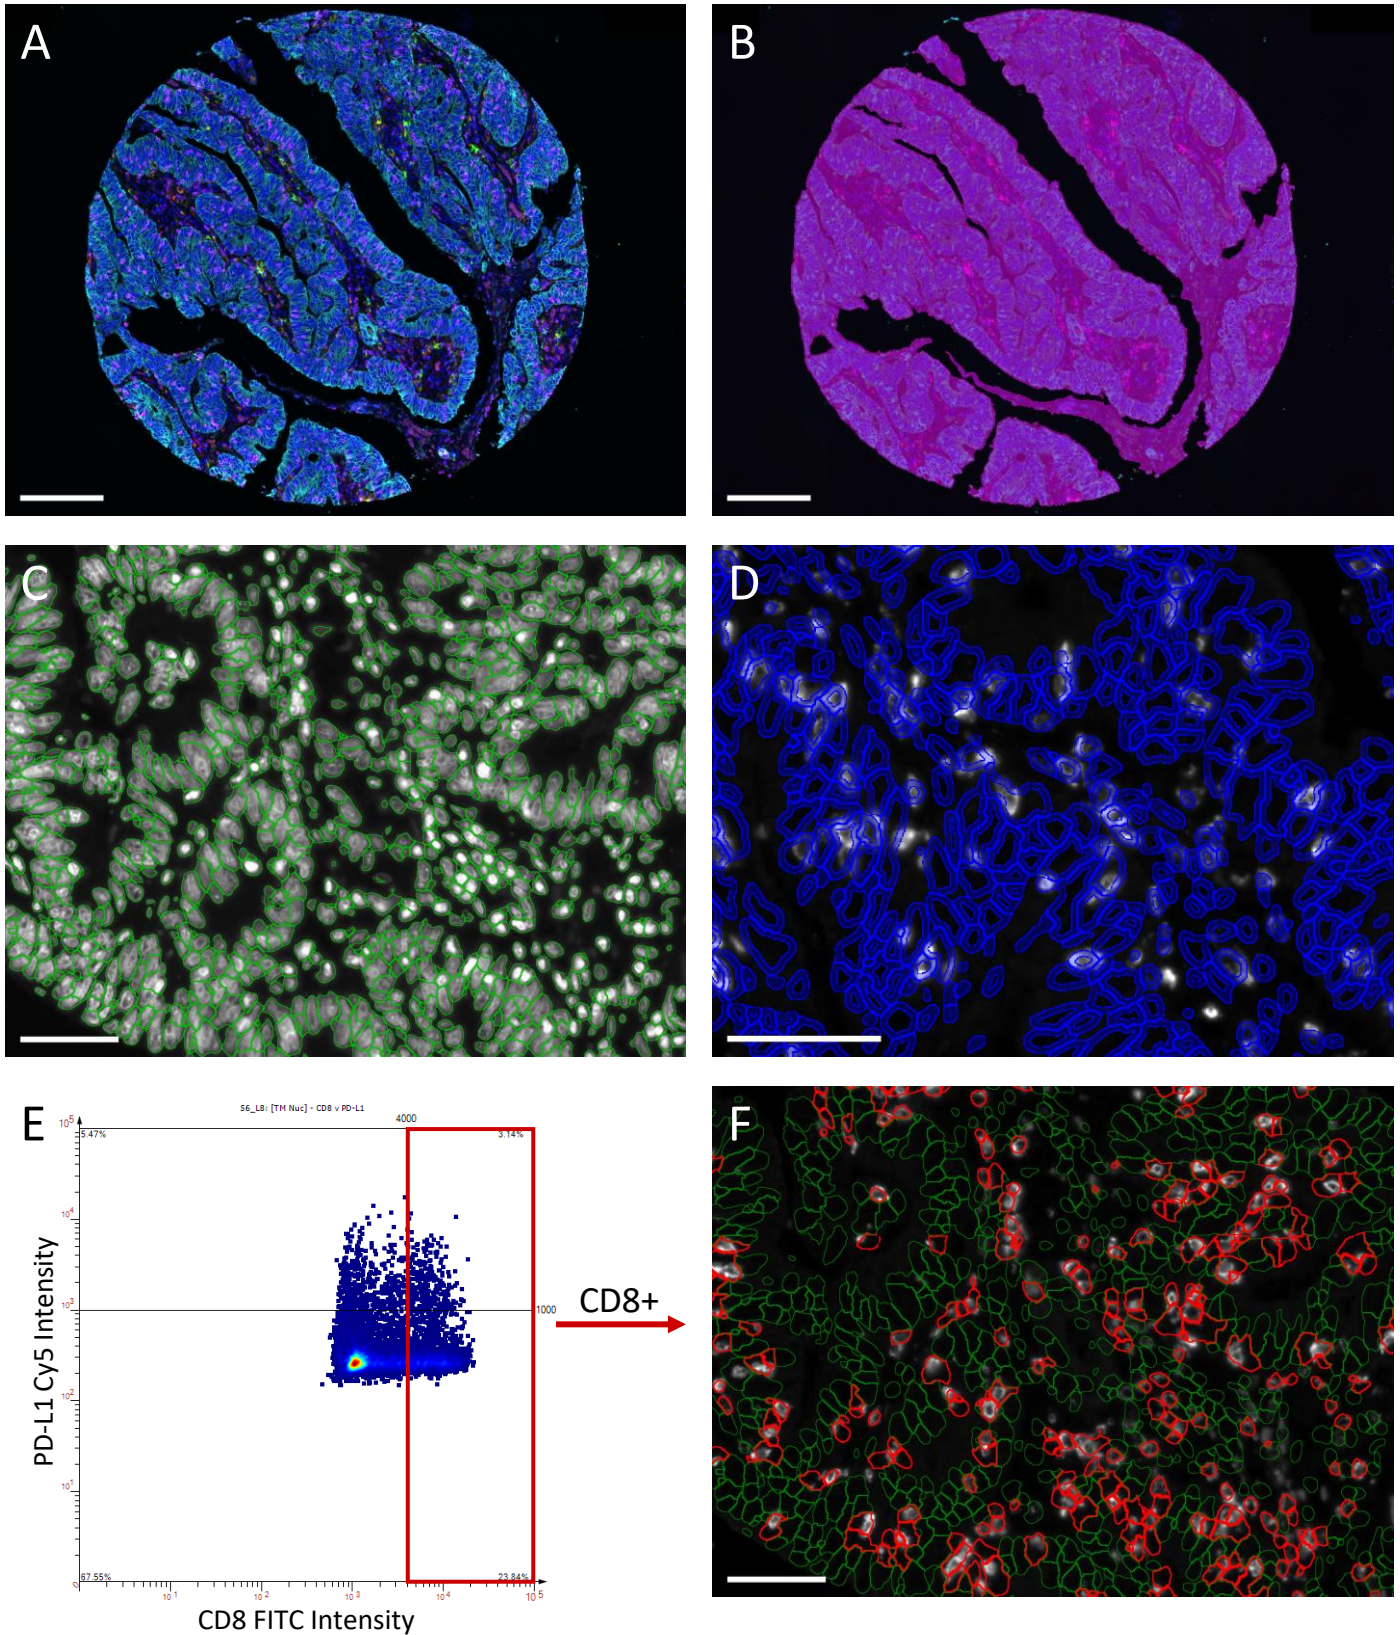

**Supplementary Figure 2. Cytometric Quantitation of Scanned Images.**

**A.** Colon cancer tissue core displaying five fluorescent channels. **B.** Automated tissue mask detection (purple overlay) allows measurement of the tissue area, and limits analysis to cells on the tissue mask. **C.** Nuclear segmentation (green outline) using DAPI staining identifies individual cells. **D.** A cellular membrane mask (blue ring) allows quantitation of membranous markers e.g. CD8 (displayed) for each cell. **E.** Scattergrams are used to display cell characteristics for each marker, and allow identification of single, double and triple-positive cells. Here the staining intensity of CD8 (x-axis) and PD-L1 (y-axis) within each cell mask are displayed. **F.** CD8+ cells (red nuclei) can be visualised by ‘backgating’ cells with a FITC intensity above a user-defined threshold (red box) using scattergrams. Scale bars A & B 200µm, C, D & F 50µm.



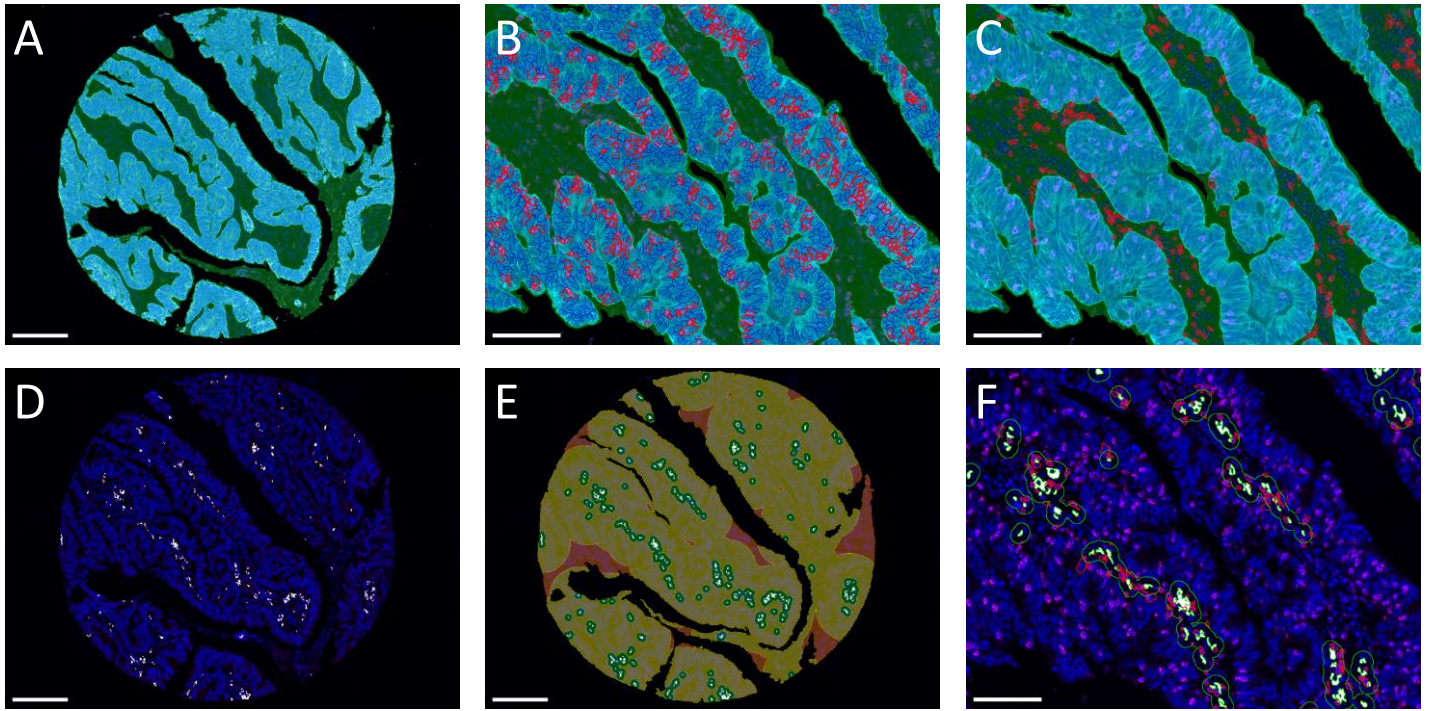

### Supplementary Figure 3. Spatial Distribution

Spatial distribution of cell populations was assessed by creating masks and limiting cell counts to these compartments. **A.** Epithelial (cyan) and stromal (green) masks based on the presence or absence of cytokeratin staining. **B.** Intratumoral CD8<sup>+</sup> cells (red nuclei) located on the epithelial mask (cyan). **C.** Stromal CD8<sup>+</sup> cells (red nuclei). **D.** A CD11c mask (white) created by thresholding on the CD11c channel. **E.** The distance transform algorithm allows creation of distance bands 0-10µm (green), 10-100µm (yellow) and >100µm (red) from the CD11c mask (white), allowing quantitation of CD8<sup>+</sup> densities within each zone. **F.** DAPI (blue) and CD8 (magenta) stains overlaid with the CD11c mask (white) and 0-10µm distance zone (green contour). CD8<sup>+</sup> cells within 10µm of the CD11c mask are highlighted red. Scale bars A, D & E 200µm, B, C & F 100µm.

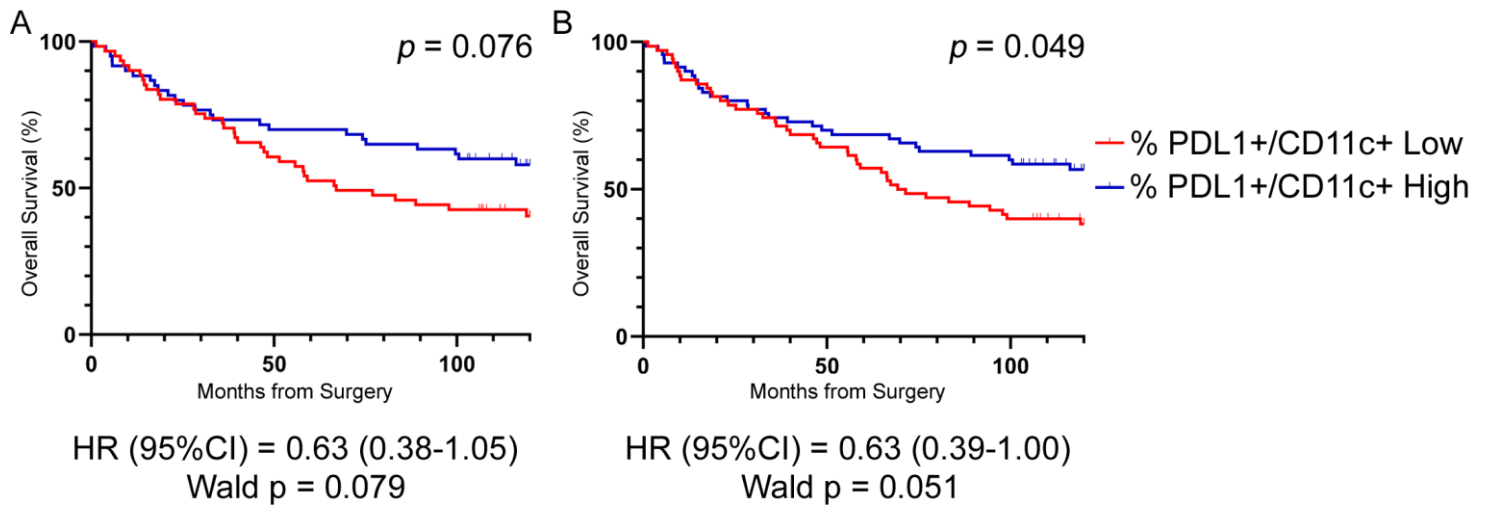

**Supplementary Figure 4. Overall survival by percentage of CD11c<sup>+</sup> cells expressing PD-L1**

Survival curves for the percentage of PD-L1-expressing CD11c<sup>+</sup> cells in the tumor (A) and stromal (B) regions of leading edge cores. Log-Rank p-values and corresponding univariate Cox regression analysis results are presented.
